# Supplementary material
Source: Research Square preprint supplement (doi:10.21203/rs.3.rs-8876603/v1)
Supplement: Supplementary file 1 [file 4d762ddfede01763394235da.docx]

**Needs Assessment Survey:**

**Simulation-Based Learning in FCPS Residency Training**

**Introduction:**
I am **Prof. Dr. Brekhna Jamil Khan**  conducting a **national needs-assessment study** to develop a **Simulation-Based Learning Curriculum** for **FCPS residency programs** in Medicine & Allied, Surgical & Allied, and Obstetrics & Gynaecology.

The goal of this study is to understand your perspectives on current training gaps, experiences with simulation, and priorities for integrating simulation-based learning into postgraduate training. Your input is essential for designing a relevant, evidence-informed, and effective curriculum aligned with CPSP competencies.

**Duration:** Approximately 15–20 minutes

**Participation:** Voluntary and anonymous

Please contact for any queries.

**Prof. Dr. Brekhna Jamil Khan**

**Professor Medical Education**, Khyber Medical University, Peshawar

Email: [brekhnajamil@kmu.edu.pk](mailto:brekhnajamil@kmu.edu.pk)

**Consent Statement**

The information you provide will be used solely for academic research and curriculum development. Participation is voluntary, and your responses will remain confidential and anonymous. You may skip any question or withdraw at any time before submission.

By selecting **“I consent,”** you confirm that:
• You have read and understood the purpose of the study and your rights as a participant.
• You voluntarily agree to participate in this survey.

✅ I consent to participate in this study.

⛔ I do not consent (exit the survey).

“Thank you for your time. You have chosen not to participate; your responses will not be recorded.”

**Section 1. Demographic Information**

**1. Specialty / Department:**
□ Medicine & Allied

□ Surgery & Allied

□ Obstetrics & Gynaecology

**2. Your Primary Role (please select one):**
□ FCPS Resident □ Faculty Supervisor □ Program Director

**2. If you are an FCPS Resident, please answer the following:**

- **Year of Training:** □ Year 1 □ Year 2 □ Year 3 □ Year 4 □ Completed (awaiting exam)

**3. If you are Faculty or a Program Director, please answer the following:**

a. Years of Teaching / Supervising Experience: [ ] <5 [ ] 5–10 [ ] >10 years

b. Have you ever facilitated or supervised simulation sessions? [ ] Yes [ ] No

**Years of Teaching / Supervising Experience:** □ <5 □ 5–10 □ >10 years

- **Have you ever facilitated or supervised simulation sessions?** □ Yes □ No
- **N/A**

**5. Institution / Hospital:** ____________________________

**6. Gender:** □ Male □ Female □ Prefer not to say

**7. Prior Exposure to Simulation (Select all that apply):**

- Department-based sessions
- Institutional Simulation Center
- CPSP-organized workshop
- External/Course-based simulation
- None

**Section 2: Perceived Importance and Current Training Gaps**

This section maps to CPSP core domains. Please rate each competency based on two criteria:

Please rate each competency using the following two scales:

- **Column A:** How essential is this for your specialty? (1 = Not Essential → 5 = Highly Essential)
- **Column B:** How well is it currently addressed in your FCPS training? (1 = Not Addressed → 5 = Fully Addressed)

| **Competency Area** | **How Essential?** | **How Well Addressed?** |
| --- | --- | --- |
| **Medical Expert / Clinical Care** |  |  |
| History Taking & Clinical Reasoning | 1 2 3 4 5 | 1 2 3 4 5 |
| Physical Examination & Diagnostic Skills | 1 2 3 4 5 | 1 2 3 4 5 |
| Procedural and Technical Skills | 1 2 3 4 5 | 1 2 3 4 5 |
| Management of Common Conditions | 1 2 3 4 5 | 1 2 3 4 5 |
| Evidence-Based Practice | 1 2 3 4 5 | 1 2 3 4 5 |
| **Communicator** |  |  |
| Communication with Patients/Families | 1 2 3 4 5 | 1 2 3 4 5 |
| Breaking Bad News | 1 2 3 4 5 | 1 2 3 4 5 |
| **Collaborator** |  |  |
| Communication & Teamwork | 1 2 3 4 5 | 1 2 3 4 5 |
| Interprofessional Handover | 1 2 3 4 5 | 1 2 3 4 5 |
| **Leader / Manager** |  |  |
| Leadership in Teams | 1 2 3 4 5 | 1 2 3 4 5 |
| Resource Management & Discharge Planning | 1 2 3 4 5 | 1 2 3 4 5 |
| **Health Advocate** |  |  |
| Health Promotion & Disease Prevention | 1 2 3 4 5 | 1 2 3 4 5 |
| **Scholar** |  |  |
| Teaching & Supervision of Juniors | 1 2 3 4 5 | 1 2 3 4 5 |
| **Professional** |  |  |
| Patient Safety & Error Management | 1 2 3 4 5 | 1 2 3 4 5 |
| Ethical & Medico-Legal Dilemmas | 1 2 3 4 5 | 1 2 3 4 5 |
| **Acute Care & Patient Safety** |  |  |
| Emergency & Crisis Management | 1 2 3 4 5 | 1 2 3 4 5 |

**Section 3. Experience with Simulation-Based Learning (SBL)**

7. **Have you participated in or facilitated any simulation-based learning as part of your FCPS program?**

- Yes
- No → If No, skip to Section 5.

**8. If yes, please describe your experience:**

- a. Frequency: [ ] Once only [ ] Occasionally (1-2 times/year) [ ] Regularly (3-5 times/year) [ ] Often (>5 times/year)
- b. Types of simulation used (Select all that apply):
  - Mannequin-based (e.g., high-fidelity mannequin)
  - Task trainers (e.g., for IV placement, suturing)
  - Standardized Patients (Actors)
  - Virtual Reality / Computer-based
  - Hybrid simulation (combination of the above)
- c. How would you rate the overall effectiveness of these sessions? (1=Not effective, 5=Highly effective) 1 2 3 4 5
- d. **Main Strengths (Select all that apply):**
  ☐ Safe, risk-free learning environment
  ☐ Hands-on practice
  ☐ Immediate feedback/debriefing
  ☐ Standardized learning for all
  ☐ Practice of rare/critical events
  ☐ Improved confidence
  ☐ Focused on teamwork/communication
  ☐ Other: ______________________
- e. **Main Limitations (Select all that apply):**
  ☐ Lack of time in curriculum
  ☐ Unrealistic scenarios
  ☐ Poor debriefing/facilitation
  ☐ Lack of follow-up integration
  ☐ Limited equipment/space
  ☐ Too many participants
  ☐ Lack of clear objectives
  ☐ Other: ______________________

**Section 4. Priorities for Simulation Integration**

**9. Based on your experience, please list 3-5 high-priority clinical scenarios or skills in your specialty that would benefit most from simulation-based training.** (e.g., septic shock workup, laparoscopic cholecystectomy, obstetric hemorrhage drill, breaking bad news to a family, Lumbar Puncture, Breaking Bad News, Central Line Insertion, Informed Consent for High-Risk Surgery, Laparoscopic Skills, PPH/Obstetric Hemorrhage Drill etc. )

1.

2.

3.

4.

5.

**10. What are the most significant barriers to implementing simulation-based learning in your department? (Select all that apply)**

☐ Lack of faculty training
☐ Time constraints in schedule
☐ Inadequate infrastructure/equipment
☐ High cost/funding issues
☐ Lack of administrative support
☐ Lack of simulation technicians
☐ Cultural resistance
☐ Other: ______________________

**11. What solutions or enablers would make simulation integration more feasible?** (select all that apply)

Faculty development workshops
☐ Dedicated funding and space
☐ Integration into FCPS logbook
☐ Administrative support
☐ Simulation coordinators/technicians
☐ Low-cost, high-impact models
☐ Central simulation center
☐ Other: ______________________

**Section 5. Defining Your Specialty’s Simulation Needs**

Part 6A: **Please mention any *five (5) core competencies* in your specialty where you believe simulation-based modules should be integrated.**
*(Refer to CPSP e-logbook or training requirements for guidance.)*

| **Core Competency (From Specialty Logbook)** | **Suggested Simulation Focus (Scenario / Skill)** | **Simulation Type (Mannequin / SP / VR / Task Trainer)** |
| --- | --- | --- |
| 1. |  |  |
| 2. |  |  |
| 3. |  |  |
| 4. |  |  |
| 5. |  |  |

**Expected Outcomes (Select Top 3)**

☐ Improved Technical Skill Proficiency
☐ Enhanced Clinical Decision-Making
☐ Increased Trainee Confidence
☐ Standardized Training Exposure
☐ Improved Patient Safety
☐ Better Non-Technical Skills
☐ More Reliable Assessment
☐ Other: ______________________

| **Core Competency (CPSP Logbook)** | **Suggested Simulation Scenario** | **Type of Simulation** |
| --- | --- | --- |
| Example (Medicine): Acute Arrhythmias | ACLS scenario for unstable VT/VF | ☐ Mannequin ☐ Task Trainer ☐ SP ☐ VR ☐ Hybrid |
| Example (Surgery): Laparoscopic Suturing | Knot-tying on simulator | ☐ Mannequin ☐ Task Trainer ☐ SP ☐ VR ☐ Hybrid |
| Example (OB/GYN): Shoulder Dystocia | McRoberts/suprapubic pressure drill | ☐ Mannequin ☐ Task Trainer ☐ SP ☐ VR ☐ Hybrid |
| 1. |  | ☐ ☐ ☐ ☐ ☐ |
| 2. |  | ☐ ☐ ☐ ☐ ☐ |
| 3. |  | ☐ ☐ ☐ ☐ ☐ |
| 4. |  | ☐ ☐ ☐ ☐ ☐ |
| 5. |  | ☐ ☐ ☐ ☐ ☐ |

**Section 6: Integration with CPSP Framework**

**12. How should simulation be integrated into the FCPS curriculum? (Select all that apply)**

- - Mandatory sessions during Module I Orientation
  - Periodic workshops throughout residency (e.g., annually)
  - Linked to specific logbook competencies for certification
  - As a component of formative assessment (e.g., mini-CEX, OSCE)
  - As a component of high-stakes summative assessment (e.g., Mock Exit Exams)

**13. Would you support the inclusion of mandatory, standardized simulation-based components in the CPSP assessment system?**

- - Yes
  - No
  - Maybe

**14. Please provide any additional suggestions for integrating SBL into FCPS training requirements:**

**Thank you for completing the survey. Your contribution is highly valued.**
