# Supplementary material
Source: Research Square preprint supplement (doi:10.21203/rs.3.rs-8876603/v1)
Supplement: Supplementary file 2 [file 83733dd3c3b97958382eb95f.docx]

**Interview Guide**

**(For Faculty and Program Directors)**

**Purpose:** To gain insights into training gaps, feasibility, and strategies for integrating simulation within FCPS curricula.

**Guiding Questions**

1. What are the most critical competencies FCPS residents must master by program completion (aligned with CPSP logbook outcomes)?
2. Which competencies are least addressed by current clinical exposure?
3. Have you previously implemented or observed SBL in FCPS training?
4. Which simulation scenarios would most enhance your discipline (e.g., CPR, obstetric hemorrhage, trauma, pediatric resuscitation)?
5. What are the barriers to implementing simulation at your institution (faculty, infrastructure, cost, culture)?
6. How do you perceive faculty readiness for simulation facilitation and debriefing?
7. What faculty development or institutional support is needed for sustainable SBL integration?
8. How can simulation be formally mapped to CPSP curriculum modules or logbooks (skills checklists, formative feedback, workshops)?
